# Supplementary material for: At-home wearable-based monitoring predicts clinical measures and biological biomarkers of disease severity in Friedreich’s Ataxia
Source: PubMed Central journal article supplement — Commun Med (Lond). 2024 Oct 29;4:217. doi: 10.1038/s43856-024-00653-1 (PMC11519636; doi:10.1038/s43856-024-00653-1), 2024-10-29
Supplement: 43856_2024_653_MOESM1_ESM.pdf [file 43856_2024_653_MOESM1_ESM.pdf]

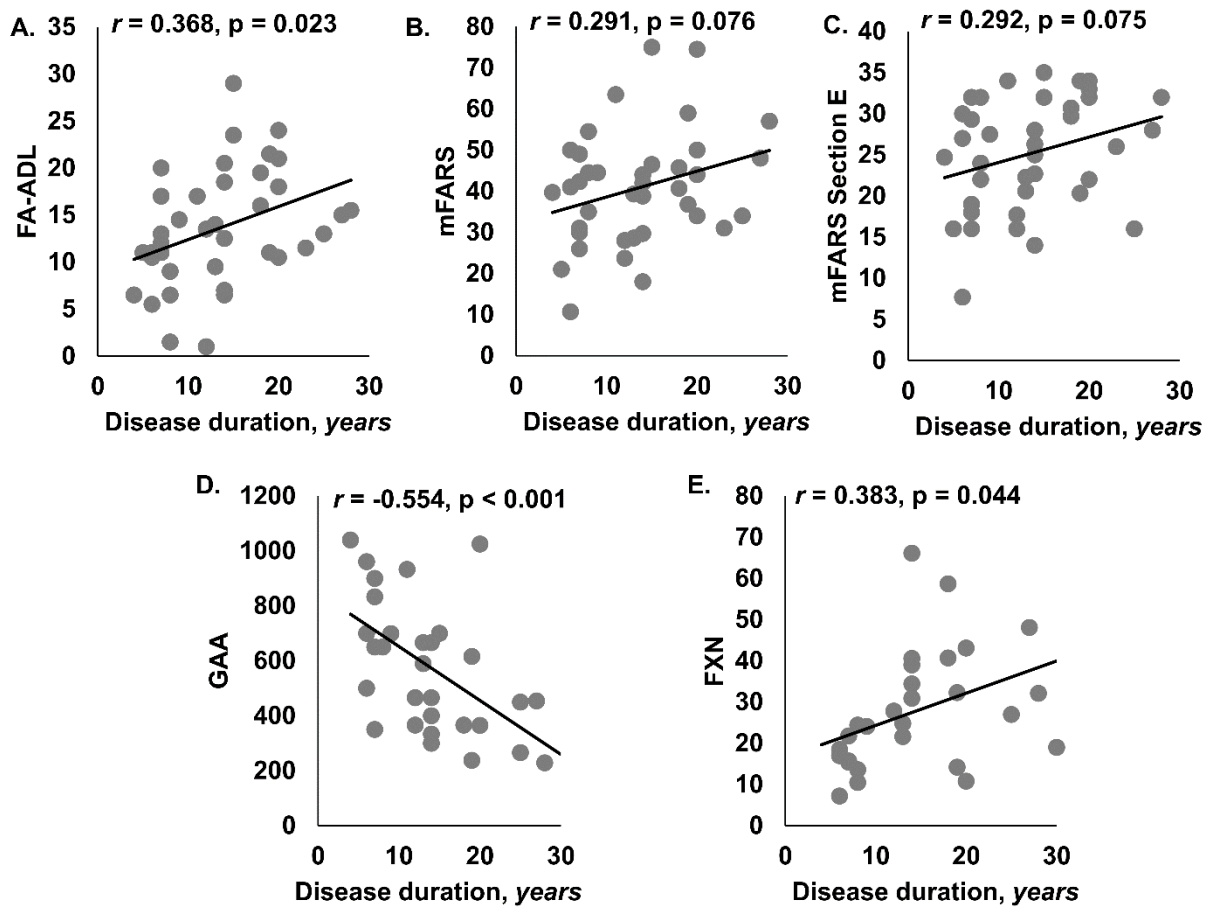

**Supplementary Figure S1:** Correlations of disease duration with clinical scores (FA-ADL (A), mFARS (B), mFARS Section E (C)) and biological biomarkers of disease severity (GAA (D) and FXN (E)). FXN data was available for 28 participants.
