# Supplementary material for: At-home wearable-based monitoring predicts clinical measures and biological biomarkers of disease severity in Friedreich’s Ataxia
Source: PubMed Central journal article supplement — Commun Med (Lond). 2024 Oct 29;4:217. doi: 10.1038/s43856-024-00653-1 (PMC11519636; doi:10.1038/s43856-024-00653-1), 2024-10-29
Supplement: 43856_2024_653_MOESM2_ESM.pdf [file 43856_2024_653_MOESM2_ESM.pdf]

## Description of Additional Supplementary Files

**File name:** Supplementary Data 1

**File description:** All physical activity metrics are averaged daily values measured over 7 consecutive days. The correlation coefficients ( $r$  or  $\rho$ ) are reported, along with p-values adjusted for false discovery rate (FDR). FA-ADL LL: Lower limb subdomain score of FA-ADL (summation of items 6. Falling, 7. Walking, and 8. Sitting). Bold text highlights significant results ( $p < 0.05$ ).

**File name:** Supplementary Data 2

**File description:** All GDM metrics are averaged daily values measured over 7 consecutive days. The correlation coefficients ( $r$  or  $\rho$ ) are reported, along with p-values adjusted for false discovery rate (FDR). All GDM metrics are averaged daily values measured over 7 consecutive days. The correlation coefficients ( $r$  or  $\rho$ ) are reported, along with p-values adjusted for false discovery rate (FDR). FA-ADL UL: Upper limb subdomain scores of FA-ADL (summation of items 3. Food, 4. Dressing, and 5. Hygiene). Bold text highlights significant results ( $p < 0.05$ ).

**File name:** Supplementary Data 3

**File description:** analysis of sensor-derived physical activity metrics demonstrated generally high reliability across various measures of posture and locomotion as reported in Supplementary Data 3.

**File name:** Supplementary Data 4

**File description:** Estimated average values of the sensor-derived metrics for the GDM and physical activity. Values are represented as the Average (SE).

**File name:** Supplementary Data 5

**File description:** Model 1 uses demographics information, disease duration, and GAA as the input features. Model 2 uses sensor-derived physical activity metrics as the input features. Model 3 uses demographics information, disease duration, and GAA, as well as sensor-derived physical activity metrics as the input features. Model 4 uses demographics information, disease duration, and GAA, as well as sensor-derived GDM metrics as the input features. Model 5 uses demographics information, disease duration, and GAA, as well as both sensor-derived physical activity and GDM metrics as the input features. MAE, Mean absolute error;  $r$ , Correlation coefficient;  $R^2$ , coefficient of determination. \* The model predictions were performed without including GAA.

**File name:** Supplementary Data 6

**File description:** List of variables underwent feature selection using the wrapper exhaustive approach. The model predictions were performed without including GAA.

**File name:** Supplementary Data 7

**File description:** Source data with numerical values for plotting figures.

**File name:** Supplementary Data 8

**File description:** De-Identified Data
